# Supplementary material
Source: MDPI journal article supplement (https://www.mdpi.com/2073-4441/13/11/1495)
Supplement: s1 [file s1]

## Supplementary Information

# Enhanced Adsorptive Removal of Dyes using Mandarin Peel Biochars via Chemical Activation with $\text{NH}_4\text{Cl}$ and $\text{ZnCl}_2$

Hyunjun Park <sup>1</sup>, Jiseok Kim <sup>1</sup>, Yong-Gu Lee <sup>1,\*</sup>, and Kangmin Chon <sup>1,2,\*</sup>

<sup>1</sup> Department of Environmental Engineering, College of Engineering, Kangwon National University, Kangwondaehak-gil, 1, Chuncheon-si, Gangwon-do 24341, Republic of Korea; hjpark1597@naver.com (H.P.); skyjskim95@gmail.com (J.K.)

<sup>2</sup> Department of Integrated Energy and Infra system, Kangwon National University, Kangwondaehak-gil, 1, Chuncheon-si, Gangwon-do 24341, Republic of Korea

\* Correspondence: yglee19@kangwon.ac.kr (Y.-G.L.); kmchon@kangwon.ac.kr (K.C.); Tel.: +82-33-250-6352 (K.C.)

**Table S1.** The physicochemical characteristics of the dyes.

| Compound<br>(Abbreviation) | Formula <sup>a</sup>                                                                          | MW <sup>a</sup><br>(g/mol) | Charge <sup>a</sup> |       |       |       | log <i>D</i> <sup>a</sup> |      |           |           | log <i>P</i> <sub>a</sub> | p <i>K</i> <sub>a</sub> |
|----------------------------|-----------------------------------------------------------------------------------------------|----------------------------|---------------------|-------|-------|-------|---------------------------|------|-----------|-----------|---------------------------|-------------------------|
|                            |                                                                                               |                            | pH                  | pH    | pH    | pH    | pH                        | pH   | pH        | pH        |                           |                         |
|                            |                                                                                               |                            | 3.0                 | 5.0   | 7.0   | 9.0   | 3.0                       | 5.0  | 7.0       | 9.0       |                           |                         |
| Methyl Orange<br>(MO)      | C <sub>14</sub> H <sub>14</sub> N <sub>3</sub> NaO <sub>3</sub> S                             | 327.3                      | −0.21               | −0.96 | −1.00 | −1.00 | 2.53                      | 1.54 | 1.30      | 1.29      | 2.61                      | 3.58                    |
| Fast Green FCF<br>(FG)     | C <sub>37</sub> H <sub>34</sub> N <sub>2</sub> Na <sub>2</sub> O <sub>10</sub> S <sub>3</sub> | 808.8                      | −1.24               | −1.97 | −2.01 | −2.53 | 1.18                      | 0.17 | −<br>0.04 | −<br>0.37 | 2.31                      | 3.11                    |

<sup>a</sup> ChemAxon (<http://www.chemicalize.org>, 2<sup>nd</sup> January 2021); log *D* = distribution coefficient; log *P* = partition coefficient.
